# Supplementary material
Source: MDPI journal article supplement (https://www.mdpi.com/2673-4141/4/1/6)
Supplement: s1 [file s1]

# Supplementary Materials for Article: The Boundary Between Two Modes of Gas Evolution: Oscillatory (H<sub>2</sub> and O<sub>2</sub>) and Conventional Redox (O<sub>2</sub> only), in The Hydrocarbon/H<sub>2</sub>O<sub>2</sub>/Cu(II)/CH<sub>3</sub>CN System

Igor Yu. Shchapin <sup>1,2,\*</sup> and Andrey I. Nekhaev <sup>3</sup>

Orca—an ab initio, DFT, and semiempirical SCF-MO package—version 3.0.1 was used for all DFT calculations in the BPE0/TZVPP level of theory. The ChemCraft 1.7 program was used to create input files, visualize and design the calculation results.

**Table S1.** The Charge, Spin state, Energy and XYZ coordinates of all atoms of all structures optimized by the DFT method.

## Type of chemical structure (Charge;Spin state), Energy

### CuH (20)

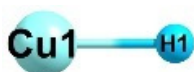

Molecule (0;1), E = -1640.833185884078 E<sub>h</sub>

Radical Anion (-1;2), E = -1640.825562232613 E<sub>h</sub>

|    |             |             |             |    |             |             |             |
|----|-------------|-------------|-------------|----|-------------|-------------|-------------|
| Cu | 0.000000000 | 0.000000000 | 0.158466000 | Cu | 0.000000000 | 0.000000000 | 0.097687000 |
| H  | 0.000000000 | 0.000000000 | 1.633212000 | H  | 0.000000000 | 0.000000000 | 1.693991000 |

### Cu<sub>2</sub> (21)

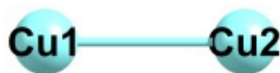

Molecule (0;1), E = -3280.540332075323 E<sub>h</sub>

Radical Anion (-1;2), E = -3280.557003438048 E<sub>h</sub>

|    |             |             |              |    |             |             |              |
|----|-------------|-------------|--------------|----|-------------|-------------|--------------|
| Cu | 0.000000000 | 0.000000000 | -1.133974000 | Cu | 0.000000000 | 0.000000000 | -1.190713000 |
| Cu | 0.000000000 | 0.000000000 | 1.133974000  | Cu | 0.000000000 | 0.000000000 | 1.190713000  |

### Cu<sub>2</sub>O (22)

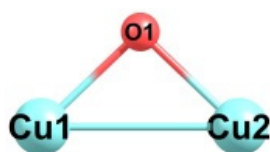

Molecule (0;1), E = -3355.687224138422 E<sub>h</sub>

Radical Anion (-1;2), E = -3355.709345013066 E<sub>h</sub>

|    |              |             |              |    |              |             |              |
|----|--------------|-------------|--------------|----|--------------|-------------|--------------|
| Cu | -1.274310000 | 0.000000000 | -0.086185000 | Cu | -1.239288000 | 0.000000000 | -0.116458000 |
| O  | -0.000000000 | 0.000000000 | 1.136921000  | O  | 0.000001000  | 0.000000000 | 1.197466000  |
| Cu | 1.274310000  | 0.000000000 | -0.086185000 | Cu | 1.239287000  | 0.000000000 | -0.116457000 |

(Single point calculations)

Atom (0;2), E = -1640.236451203338 E<sub>h</sub>

|    |             |             |             |
|----|-------------|-------------|-------------|
| Cu | 0.000000000 | 0.000000000 | 0.000000000 |
|----|-------------|-------------|-------------|

Cu (23)

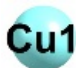

(Single point calculations)

Anion (-1;1), E = -1640.261078219124 E<sub>h</sub>

|    |             |             |             |
|----|-------------|-------------|-------------|
| Cu | 0.000000000 | 0.000000000 | 0.000000000 |
|----|-------------|-------------|-------------|

CuCl (24)

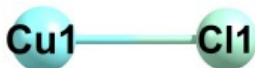

Molecule (0;1), E = -2100.368056439018 E<sub>h</sub>

|    |              |              |              |
|----|--------------|--------------|--------------|
| Cu | -0.005694000 | 0.000021000  | -0.132240000 |
| Cl | 2.070095000  | -0.000012000 | -0.132202000 |

Radical Anion (-1;2), E = -2100.401477462000 E<sub>h</sub>

|    |              |              |              |
|----|--------------|--------------|--------------|
| Cu | -0.085553000 | 0.000022000  | -0.132241000 |
| Cl | 2.149954000  | -0.000013000 | -0.132201000 |

Cl (25)

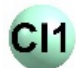

(Single point calculations)

Atom (0;2), E = -459.996618462930 E<sub>h</sub>

|    |             |             |             |
|----|-------------|-------------|-------------|
| Cl | 0.000000000 | 0.000000000 | 0.000000000 |
|----|-------------|-------------|-------------|

(Single point calculations)

Anion (-1;1), E = -460.116771209037 E<sub>h</sub>

|    |             |             |             |
|----|-------------|-------------|-------------|
| Cl | 0.000000000 | 0.000000000 | 0.000000000 |
|----|-------------|-------------|-------------|

CuCl<sub>2</sub> (26)

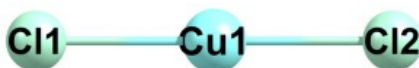

Molecule (0;2), E = -2560.458515677480 E<sub>h</sub>

|    |              |              |              |
|----|--------------|--------------|--------------|
| Cu | 0.000000000  | 0.000021000  | -0.132240000 |
| Cl | 2.064401000  | -0.000012000 | -0.132202000 |
| Cl | -2.064401000 | -0.000009000 | -0.132198000 |

Radical Anion (-1;1), E = -2560.605611152270 E<sub>h</sub>

|    |              |              |              |
|----|--------------|--------------|--------------|
| Cu | -0.000000000 | 0.000018000  | -0.132236000 |
| Cl | 2.141315000  | -0.000011000 | -0.132204000 |
| Cl | -2.141315000 | -0.000008000 | -0.132200000 |

Cu<sub>2</sub>Cl<sub>4</sub> (27)

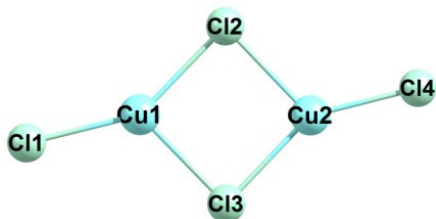

Molecule (0;3), E = -5120.975980754558 E<sub>h</sub>

|    |              |              |              |
|----|--------------|--------------|--------------|
| Cu | 1.540707000  | -0.258590000 | 0.000134000  |
| Cl | 3.620470000  | -0.086999000 | -0.000901000 |
| Cl | -0.252139000 | -1.598312000 | 0.000767000  |
| Cu | -1.540707000 | 0.258590000  | 0.000134000  |
| Cl | 0.252139000  | 1.598312000  | 0.000767000  |
| Cl | -3.620470000 | 0.086999000  | -0.000901000 |

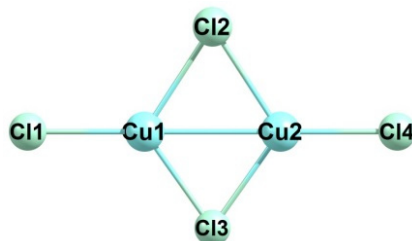

Radical Anion (-1;2), E = -5121.134650902112 E<sub>h</sub>

|    |              |              |              |
|----|--------------|--------------|--------------|
| Cu | 1.263098000  | -0.000000000 | -0.000179000 |
| Cl | 3.433506000  | 0.000000000  | 0.000152000  |
| Cl | 0.000000000  | -1.886576000 | -0.000027000 |
| Cu | -1.263098000 | -0.000000000 | -0.000009000 |
| Cl | 0.000000000  | 1.886576000  | -0.000027000 |
| Cl | -3.433506000 | 0.000000000  | 0.000090000  |

### Cu<sub>2</sub>Cl<sub>3</sub> (28)

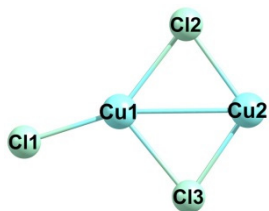

Molecule (0;2), E = -4660.897876026251 E<sub>h</sub>

|    |              |              |              |
|----|--------------|--------------|--------------|
| Cu | 1.390455000  | -0.266995000 | 0.000106000  |
| Cl | 3.476029000  | -0.025404000 | -0.000547000 |
| Cl | -0.321355000 | -1.780479000 | 0.000517000  |
| Cu | -1.239301000 | 0.222337000  | 0.000412000  |
| Cl | 0.314642000  | 1.763543000  | 0.000413000  |

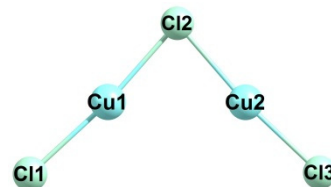

Radical Anion (-1;1), E = -4661.057944058063 E<sub>h</sub>

|    |              |              |              |
|----|--------------|--------------|--------------|
| Cu | -1.428388000 | 0.000000000  | 0.132909000  |
| Cl | 0.000001000  | -0.000000000 | 1.773292000  |
| Cl | -2.974429000 | -0.000000000 | -1.318006000 |
| Cu | 1.428393000  | 0.000000000  | 0.132901000  |
| Cl | 2.974423000  | -0.000000000 | -1.318022000 |

### Cu<sub>3</sub>Cl<sub>5</sub> (29)

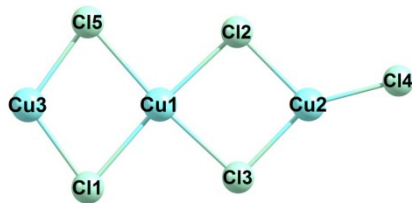

Molecule (0;3), E = -7221.407385765084 E<sub>h</sub>

|    |              |              |              |
|----|--------------|--------------|--------------|
| Cu | 1.614419000  | -0.000066000 | 0.000290000  |
| Cl | 3.155465000  | -0.000144000 | 1.774112000  |
| Cl | -0.069112000 | 0.000018000  | -1.577042000 |
| Cu | -1.642781000 | -0.000035000 | 0.011054000  |
| Cl | -0.082650000 | 0.000406000  | 1.592306000  |
| Cl | -3.670439000 | -0.000199000 | -0.508175000 |
| Cl | 3.155731000  | 0.000256000  | -1.778300000 |
| Cu | 4.414722000  | -0.000234000 | -0.001180000 |

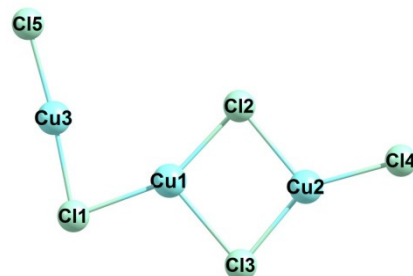

Radical Anion (-1;2), E = -7221.579242854321 E<sub>h</sub>

|    |              |              |              |
|----|--------------|--------------|--------------|
| Cu | 1.206512000  | 0.001468000  | 0.503581000  |
| Cl | 3.164243000  | 0.002147000  | 1.553343000  |
| Cl | -0.069459000 | -0.000084000 | -1.308841000 |
| Cu | -1.740017000 | -0.001181000 | 0.221588000  |
| Cl | -0.581321000 | -0.001264000 | 2.097757000  |
| Cl | -3.708035000 | -0.000903000 | -0.628927000 |
| Cl | 4.722316000  | -0.000694000 | -2.432275000 |
| Cu | 3.881116000  | 0.000513000  | -0.493163000 |

**Cu<sub>2</sub>Cl<sub>4</sub>·2AN (30)**

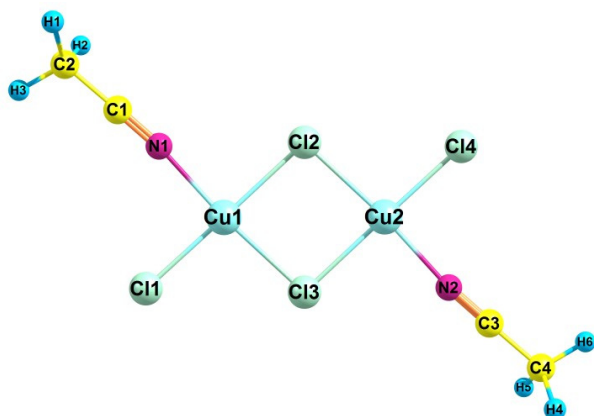

Radical Anion 30 = Radical Anion 27 + 2 Molecule 2

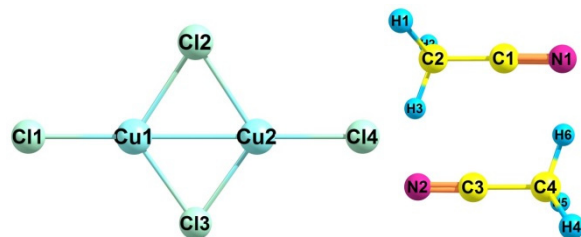

Radical Anion 27

2 Molecule 2

Molecule (0;3), E = -5386.306768478984 E<sub>h</sub>

|    |              |              |              |
|----|--------------|--------------|--------------|
| Cu | 0.612586000  | -1.567265000 | -0.000116000 |
| Cl | 2.581126000  | -2.540138000 | -0.000190000 |
| Cl | -1.463773000 | -0.566468000 | -0.000180000 |
| Cu | -0.612587000 | 1.567266000  | -0.000357000 |
| Cl | 1.463773000  | 0.566468000  | -0.000326000 |
| Cl | -2.581126000 | 2.540138000  | -0.000067000 |
| C  | -0.680033000 | -4.435088000 | 0.000053000  |
| N  | -0.284845000 | -3.363063000 | -0.000010000 |
| C  | -1.162580000 | -5.794759000 | 0.000133000  |
| H  | -1.770189000 | -5.969337000 | 0.888426000  |
| H  | -1.770167000 | -5.969450000 | -0.888153000 |
| H  | -0.315750000 | -6.481672000 | 0.000188000  |
| C  | 0.680033000  | 4.435088000  | -0.000004000 |
| N  | 0.284845000  | 3.363063000  | -0.000129000 |
| C  | 1.162581000  | 5.794759000  | 0.000153000  |
| H  | 1.770107000  | 5.969316000  | 0.888506000  |
| H  | 1.770249000  | 5.969471000  | -0.888073000 |
| H  | 0.315750000  | 6.481671000  | 0.000146000  |

Radical Anion 30 (-1;2), E = -5386.419549320808 E<sub>h</sub>

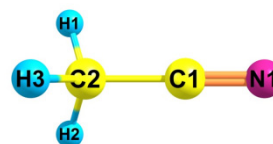

Molecule 2 (0;1), E = -132.642449209348 E<sub>h</sub>

|   |              |              |              |
|---|--------------|--------------|--------------|
| C | -0.000008000 | 0.000030000  | 0.163857000  |
| N | -0.000071000 | -0.000030000 | 1.312892000  |
| C | -0.000026000 | 0.000006000  | -1.285436000 |
| H | 0.511815000  | 0.886647000  | -1.660733000 |
| H | 0.511816000  | -0.886651000 | -1.660696000 |
| H | -1.023527000 | -0.000002000 | -1.660484000 |

### Cu<sub>3</sub>Cl<sub>4</sub> (31)

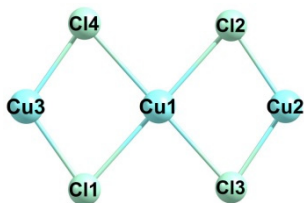

Molecule (0;2), E = -6761.320975170130 E<sub>h</sub>

|    |              |              |              |
|----|--------------|--------------|--------------|
| Cu | 0.000000000  | 0.000000000  | 0.000012000  |
| Cl | 1.593748000  | 1.784916000  | -0.000002000 |
| Cl | -1.593748000 | -1.784915000 | -0.000002000 |
| Cu | -2.816803000 | 0.000000000  | 0.000001000  |
| Cl | -1.593748000 | 1.784916000  | -0.000005000 |
| Cl | 1.593748000  | -1.784916000 | -0.000005000 |
| Cu | 2.816803000  | -0.000000000 | 0.000001000  |

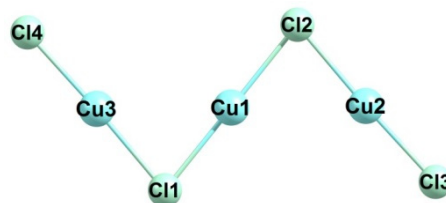

Radical Anion (-1;1), E = -6761.504989147751 E<sub>h</sub>

|    |              |              |              |
|----|--------------|--------------|--------------|
| Cu | 1.513908000  | -0.002271000 | 0.023094000  |
| Cl | 3.283837000  | -0.001504000 | 1.277750000  |
| Cl | -0.252468000 | -0.003060000 | -1.233972000 |
| Cu | -1.152019000 | -0.000549000 | 0.745256000  |
| Cl | -2.105485000 | 0.002240000  | 2.630952000  |
| Cl | 5.118268000  | 0.004375000  | -2.596373000 |
| Cu | 4.177349000  | 0.001674000  | -0.704716000 |

### Cu<sub>3</sub>Cl<sub>3</sub> (32)

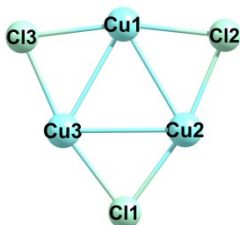

Molecule (0;1), E = -6301.307588396459 E<sub>h</sub>

|    |              |              |              |
|----|--------------|--------------|--------------|
| Cu | 0.000000000  | -0.000004000 | 1.609911000  |
| Cl | -0.000000000 | -0.000001000 | -2.400857000 |
| Cu | 1.303557000  | 0.000001000  | -0.647819000 |
| Cl | 2.169351000  | 0.000002000  | 1.357469000  |
| Cl | -2.169351000 | 0.000002000  | 1.357469000  |
| Cu | -1.303557000 | 0.000001000  | -0.647819000 |

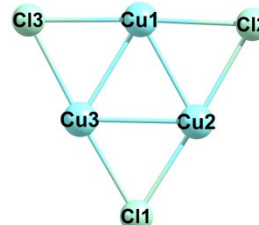

Radical Anion (-1;2), E = -6301.316250677407 E<sub>h</sub>

|    |              |              |              |
|----|--------------|--------------|--------------|
| Cu | -0.000000000 | 0.000001000  | 1.525426000  |
| Cl | 0.000000000  | 0.000001000  | -2.626425000 |
| Cu | 1.228154000  | -0.000001000 | -0.605191000 |
| Cl | 2.363945000  | 0.000000000  | 1.469867000  |
| Cl | -2.363945000 | 0.000000000  | 1.469867000  |
| Cu | -1.228154000 | -0.000001000 | -0.605191000 |

### Cu<sub>2</sub>Cl<sub>2</sub> (33)

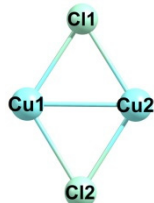

Molecule (0;1), E = -4200.819250735715 E<sub>h</sub>

|    |              |              |              |
|----|--------------|--------------|--------------|
| Cu | 0.319788000  | -1.151112000 | 0.000039000  |
| Cl | -1.851790000 | -0.511897000 | -0.000039000 |
| Cu | -0.319788000 | 1.151112000  | 0.000039000  |
| Cl | 1.851790000  | 0.511897000  | -0.000039000 |

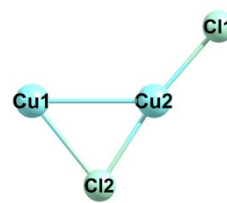

Radical Anion (-1;2), E = -4200.869614232684 E<sub>h</sub>

|    |              |              |              |
|----|--------------|--------------|--------------|
| Cu | 1.275495000  | -1.581117000 | -0.065548000 |
| Cl | -2.574267000 | 0.450995000  | 0.040161000  |
| Cu | -0.436532000 | 0.431451000  | 0.018392000  |
| Cl | 1.728784000  | 0.722025000  | 0.006995000  |
